# Supplementary figures and images for: Choline Supplementation Modifies the Effects of Developmental Alcohol Exposure on Immune Responses in Adult Rats
Source: MDPI journal article supplement (doi:10.3390/nu14142868), 2022-07-13

# Hippocampus

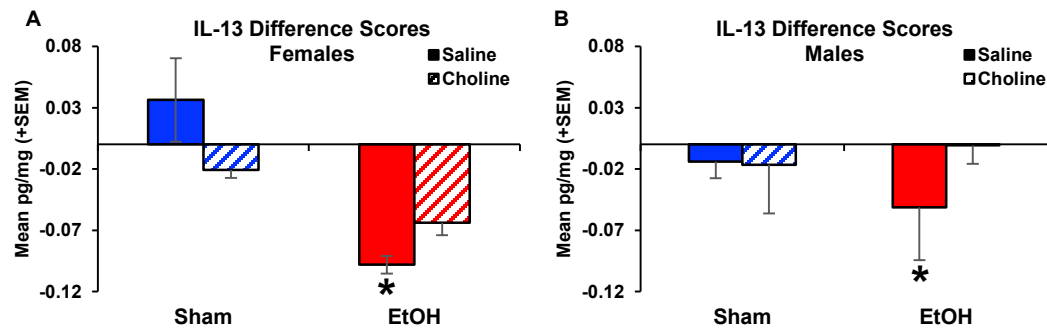

Figure S1

Supplement: s1 [file s1]
